# Supplementary material for: Broadly neutralizing antibodies from an individual that naturally cleared multiple hepatitis C virus infections uncover molecular determinants for E2 targeting and vaccine design
Source: PubMed Central journal article supplement (PMC6542541; doi:10.1371/journal.ppat.1007772), 2019-05-17
Supplement: ppat.1007772.s003.pdf [file ppat.1007772.s003.pdf]

### S3 Figure

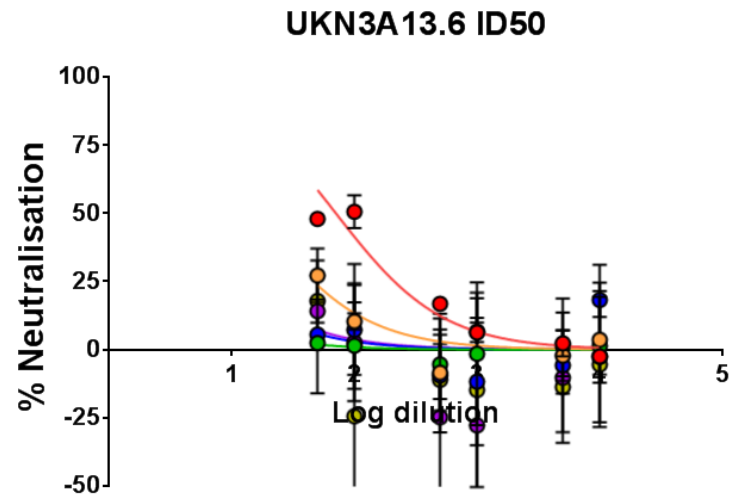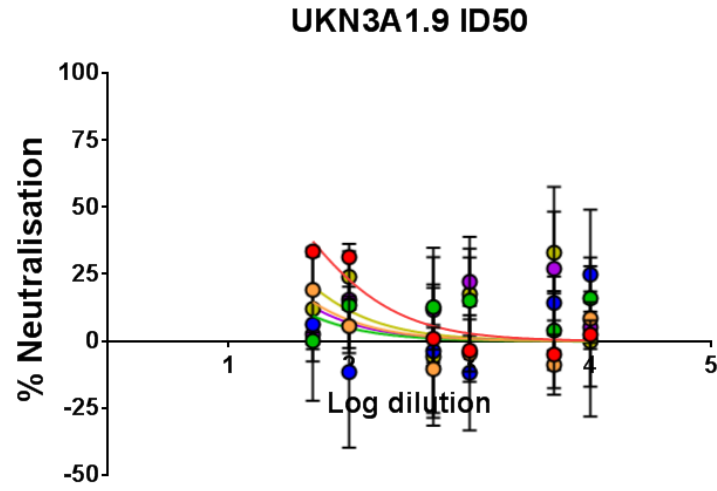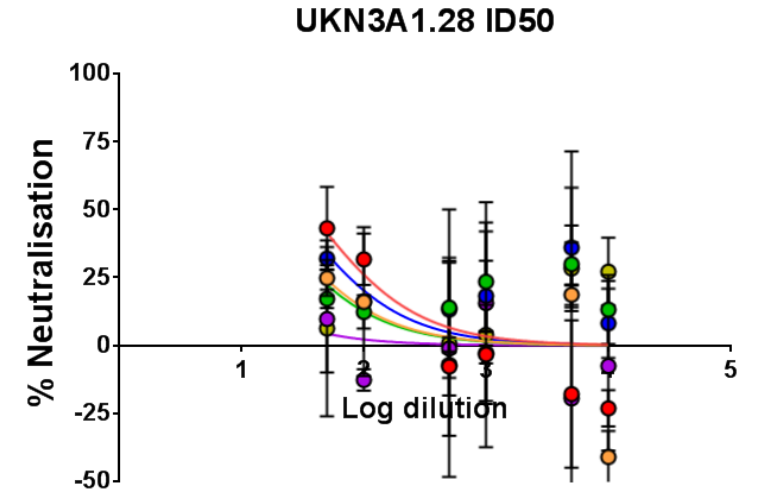

- Week 76
- Week 122
- Week 123
- Week 135
- Week 150
- Week 182
