# Supplementary material for: Broadly neutralizing antibodies from an individual that naturally cleared multiple hepatitis C virus infections uncover molecular determinants for E2 targeting and vaccine design
Source: PubMed Central journal article supplement (PMC6542541; doi:10.1371/journal.ppat.1007772), 2019-05-17

# S12 Figure

**A**

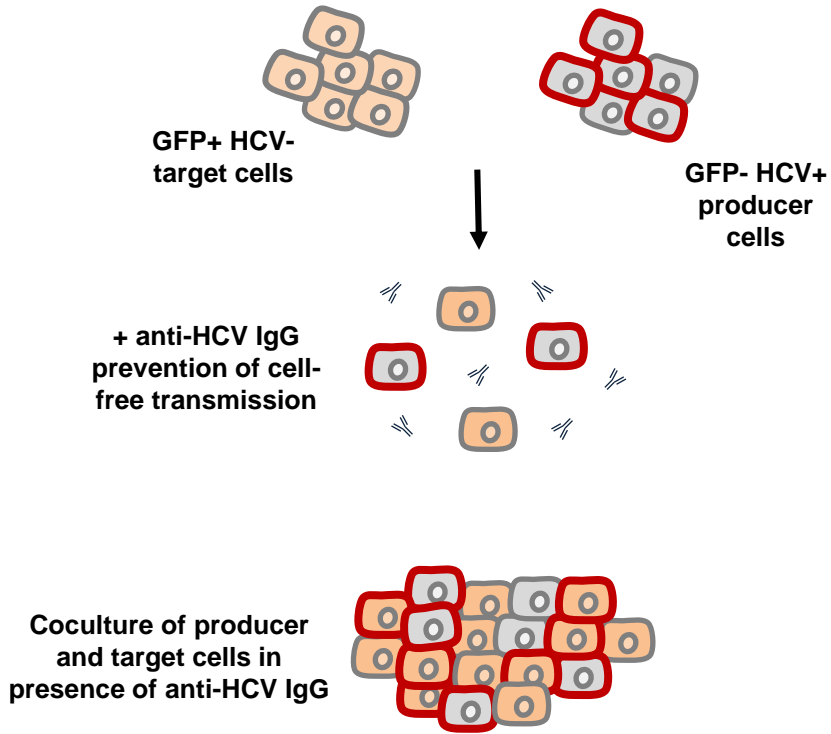

**B**

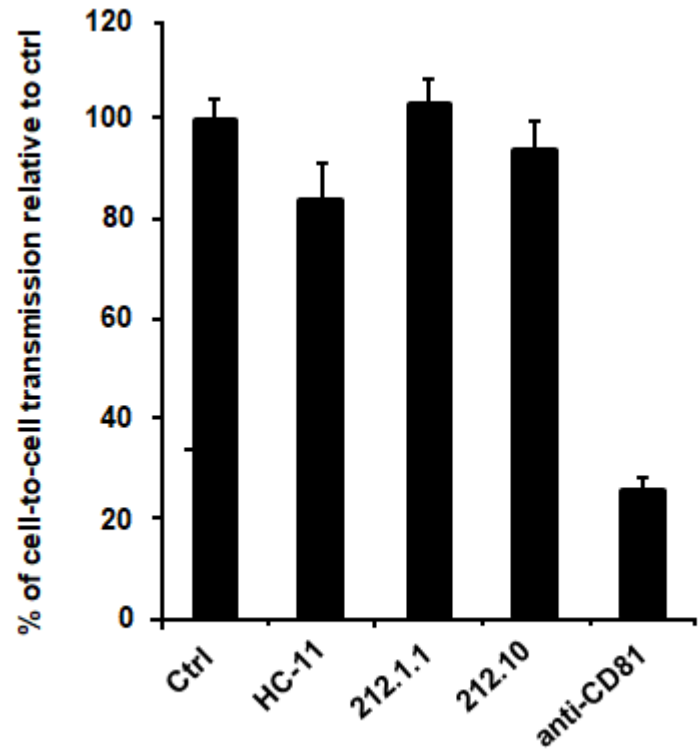

Supplement: ppat.1007772.s012.pdf [file ppat.1007772.s012.pdf]
