# Supplementary material for: Broadly neutralizing antibodies from an individual that naturally cleared multiple hepatitis C virus infections uncover molecular determinants for E2 targeting and vaccine design
Source: PubMed Central journal article supplement (PMC6542541; doi:10.1371/journal.ppat.1007772), 2019-05-17
Supplement: ppat.1007772.s013.pdf [file ppat.1007772.s013.pdf]

## S1 Table

### Chronology of multiple HCV infections

| Timepoint*    | 21            | 76 | 122           | 123 | 135 | 150 | 161 | 182 |
|---------------|---------------|----|---------------|-----|-----|-----|-----|-----|
| HCV Infection | <b>1b RNA</b> | -- | <b>1a RNA</b> | --  | --  | --  | --  | --  |
| HCV Ab        | +             | +  | +             | +   | +   | +   | +   | +   |

  

| Time Point    | 203 | 236 | 256 | 277           | 278 | 291 | 303 | 320 |
|---------------|-----|-----|-----|---------------|-----|-----|-----|-----|
| HCV Infection | --  | --  | --  | <b>3a RNA</b> | +   | +   | +   | --  |
| HCV Ab        | +   | +   | +   | +             | +   | +   | +   | +   |

\* Weeks after the initial evaluation
