# Supplementary material for: Broadly neutralizing antibodies from an individual that naturally cleared multiple hepatitis C virus infections uncover molecular determinants for E2 targeting and vaccine design
Source: PubMed Central journal article supplement (PMC6542541; doi:10.1371/journal.ppat.1007772), 2019-05-17
Supplement: ppat.1007772.s014.pdf [file ppat.1007772.s014.pdf]

## S2 Table

### Antibody binding to different HCV genotypes and autologous isolates

|         | H77c 1a | 2a  | 212 1b | 1b   | 2b   | 3a   | 4a   | 5a   | 6a   |
|---------|---------|-----|--------|------|------|------|------|------|------|
| 212.1.1 | +++     | --  | ++     | --   | --   | +    | --   | --   | --   |
| 212.9   | --      | +++ | ++++   | ++++ | +++  | --   | +    | ++++ | ++++ |
| 212.10  | ++++    | +++ | ++     | ++++ | ++   | ++   | +++  | ++++ | +++  |
| 212.15  | ++++    | +++ | ++     | ++   | +++  | --   | ++   | +    | +++  |
| 212.25  | ++++    | ++  | ++     | ++++ | +    | +    | +    | +    | ++   |
| CBH-5   | ++++    | +++ | +++    | +++  | ++++ | ++++ | ++++ | ++++ | ++++ |
