# Supplementary material for: Broadly neutralizing antibodies from an individual that naturally cleared multiple hepatitis C virus infections uncover molecular determinants for E2 targeting and vaccine design
Source: PubMed Central journal article supplement (PMC6542541; doi:10.1371/journal.ppat.1007772), 2019-05-17
Supplement: ppat.1007772.s015.pdf [file ppat.1007772.s015.pdf]

## S3 Table

### Competition of 212 antibody binding to E2

|                          |         | Biotinylated Antibody (2 µg/ml) |       |         |        |
|--------------------------|---------|---------------------------------|-------|---------|--------|
|                          |         | HC-11                           | CBH-7 | HC84.27 | HC33.1 |
| Blocking HMAB (20 µg/ml) | 212.1.1 | 62*                             | 65    | 60      | 38     |
|                          | 212.9   | 66                              | 42    | 63      | 33     |
|                          | 212.10  | 65                              | 65    | 64      | 35     |
|                          | 212.15  | 46                              | 83    | 54      | 1      |
|                          | 212.25  | 46                              | 83    | 52      | 1      |

\* Percent inhibition
